## Corrigendum

### *The Missing Link in the Hart–Dworkin Debate*

Andrzej Grabowski

(*Oxford Journal of Legal Studies*, Vol. 36, No. 3 (2016), pp. 476-481; doi: 10.1093/ojls/gqw020)

---

In the original text, there was an error in footnote 18. It should read as follows:

18. In 2013, a very interesting interview undertaken with Hart by Juan Ramón de Páramo was published as ‘Answers to Eight Questions (1988)’ in L Duarte d’Almeida, J Edwards and A Dolcetti eds, *Reading HLA Hart’s The Concept of Law* (Hart Publishing 2013) 279-297. The interview was originally published in Spanish as ‘Entrevista a HLA Hart’ (1988) 5 DOXA 339. It was also translated into German and published in (1991) 22 *Rechtstheorie* 393.
